# Supplementary material for: Combined diurnal variations of discharge and hydrochemistry of the Isunnguata Sermia outlet of the Greenland Ice Sheet give in sight on sub glacial conditions
Source: Copernicus journal article supplement (doi:10.5194/tc-2016-137), 2016-07-12
Supplement: Supplementary file [file tc-2016-137-AC2-supplement.pdf]

1 Combined diurnal variations of discharge and hydrochemistry of the Isunnguata Sermia  
2 outlet of the Greenland Ice Sheet give insight on subglacial conditions

3 Joseph Graly, Joel Harrington, Neil Humphrey

4 University of Wyoming

5 **Abstract**

6 In order to examine daily cycles in meltwater routing and storage in the ~~Isunnguata~~ Isunnguata  
7 Sermia outlet of the Greenland Ice Sheet, ~~variation~~ variations in outlet stream discharge and in major  
8 element hydrochemistry were assessed over a six day period in July, 2013. ~~Discharge~~ Over four days,  
9 discharge was assessed from hourly photography of the outlet from multiple vantages, including where  
10 mid-stream naled ice provided a natural gauge. pH, electrical conductivity, suspended sediment, and  
11 ~~alkalinity~~ major element and anion chemistry were measured in samples of stream water collected every  
12 three hours. ~~Element and ion concentrations were subsequently measured in a laboratory setting.~~

13 Photography and stream observations reveal that although river width and stage have only slight  
14 diurnal variation, there are large diurnal changes in discharge shown ~~in~~ by the ~~portion doubling in width~~  
15 of what we term the width-“active channel”, which is characterized by large standing waves and fast flow.  
16 ~~Width of this active channel approximately doubles over a diurnal cycle. Together with changes in flow~~  
17 ~~over the naled, these features allow an observationally based relative record of stream discharge in this~~  
18 ~~unconstrained alluvial setting. Peaks in discharge were offset by 3-7 hours from peak melt of the interior~~  
19 ~~ice surface.~~

20 ~~Concentration~~ The concentration of dissolved solutes follows a sinusoidal diurnal cycle, except for  
21 large and variable increases in dissolved solutes during the stream’s waning flow. ~~Diurnal changes in solute~~  
22 ~~concentration average 31% of the base value. Diurnal solute concentration~~ Solute concentrations vary by  
23 ~30% between diurnal minima and maxima. Discharge maxima and minima lag ~~peak and minimum~~

Formatted: Font: Tahoma, 10 pt, Font color: Black

Formatted: Font: Tahoma, 10 pt, Font color: Black

Formatted: Font: Tahoma, 10 pt, Font color: Black

Formatted: Font: Not Bold

24 ~~stream~~temperature and surface melt by 3-7 hours; diurnal solute concentration minima and maxima lag

25 discharge by 3-6 hours.

26 This phase shift between discharge and solute concentration suggests that during high flow, water  
27 is either encountering more rock material or is stored in longer contact with rock material. We suggest  
28 that expansion of a distributed subglacial hydrologic network into seldom accessed regions during high  
29 flow could account for these phenomena, and for a spike of partial silicate reaction products during  
30 waning flow, which itself suggests a pressure threshold-triggered release of stored water.

## 32 1. Introduction

33 Dissolved load in glacial outlet streams has long been employed as a metric for assessing water-  
34 rock interactions occurring beneath glaciers and ice sheets. Glacierized basins have comparable dissolved  
35 loads to non-glacial rivers, but are enriched in mobile cations and depleted in Si (Anderson et al., 1997).  
36 ~~Chemistry~~The chemistry of glacial water typically suggests that observed solute concentrations are  
37 reached due to presence of reactive accessory minerals and fresh mineral surfaces in glacial sediments  
38 (Drever and Hurcomb, 1986). Dissolved load is therefore linked to physical erosion in subglacial  
39 environments (Anderson, 2005). Dissolved load is also indicative of the degree to which atmospheric gases  
40 have been sequestered by chemical processes in the subglacial environment (Hodson et al., 2000).

41 Diurnal variation of solute concentration is a potential indicator of meltwater routing and storage-  
42 ~~Solute concentration is controlled by total water-rock contact during water residence time in the~~  
43 ~~subglacial environment and by~~ (e.g. Brown, 2002). ~~Solute concentration is controlled by total water-rock~~  
44 ~~contact over the water residence time in the subglacial environment and by the~~ reactivity of minerals  
45 contacted by the water. In particular, two end member cases are expected: if dilution produces an inverse  
46 relationship between discharge and solute concentration, minimal changes in water-rock interaction over

47 time are suggested; whereas if increased discharge is coupled to increased solute concentration, diurnal  
48 changes in the processes of water-rock interaction or storage are suggested.

49 ~~Studies~~ Several studies of small alpine glaciers have ~~typically~~ found solute concentration and  
50 discharge to vary inversely, with rising discharges corresponding to falling concentrations of dissolved  
51 solutes (~~Collins, 1995; Hindshaw et al., 2011; Tranter et al., 1993~~)(e.g. Collins, 1995; Hindshaw et al., 2011;  
52 Tranter et al., 1993; Tranter and Raiswell, 1991). Ions produced by saturation limited reactions, such as  
53 calcite dissolution, can show increased load with discharge, but typically with diminished concentration  
54 per water volume (Mitchell and Brown, 2007). Elements that are limited by factors such as the rate of  
55 sorption/desorption will have constant flux levels and will only be diluted by increased water flow  
56 (Mitchell and Brown, 2007). ~~Resultantly~~Consequently, correlations between discharge and dissolved load  
57 are typically weak (~~Collins and MacDonald, 2004~~)(Collins and MacDonald, 2004). These dilution  
58 relationships have been attributed to the dominance of conduit channelized flow in alpine environments.  
59 In cases where subglacial water is confined to fixed conduits, increased water flow will expand the size of  
60 ~~these~~the conduits and increase the speed of through-flow but will have a minimal impact on the area of  
61 water-bed contact (Nye, 1976; Röthlisberger, 1972).

62 ~~Studies of larger glacial systems suggest more complex water-rock interactions. In~~Larger glacial  
63 systems have more complex water-rock interactions (e.g. Wadham et al., 2010), and have frequently  
64 demonstrated more complex hysteresis in the relationship between discharge and solute concentration.  
65 At the outlet of a large glacierized basin in SE Alaska, increases in dissolved load lag spikes in discharge by  
66 several days (Anderson et al., 2003). Anderson and others attribute this to storage of water in a distributed  
67 system only released during the waning stages of flow. In distributed or linked-cavity flow, increased  
68 discharge allows flowing water to spread out across the glacier's bed and thereby increase the area of  
69 water-bed contact (Humphrey, 1987; Kamb, 1987). Time series data from the Watson River, near  
70 Kangerlussuaq, West Greenland, show out of phase variation in discharge and solute concentration, with

71 maximum daily solute concentrations occurring ~~as on the rising limb of the~~ discharge ~~is rising and minima~~  
72 ~~occurring as discharge is falling~~ hydrograph (Yde et al., 2014). However, on the scale of the melt season as  
73 a whole, Yde and others find a strong inverse correlation between discharge and solute concentration,  
74 which they attribute to conduits carrying a substantially higher portion of the meltwater flow than the  
75 distributed subglacial system. Lags between minimum discharge and peak solute concentrations ~~are have~~  
76 also ~~been~~ observed ~~at in karst dominated systems, such as~~ Tsanfleuron ~~Glacier~~, Swiss Alps, ~~where flux from~~  
77 ~~groundwater is hydrologically important~~ (Zeng et al., 2012)(Zeng et al., 2012). ~~Such lags are also observed~~  
78 ~~in non-glacial streams and have long been understood to result from the mixing of groundwater, soil~~  
79 ~~water, and surface runoff –each having a unique response time to rainfall events (e.g. Evans and Davies,~~  
80 ~~1998). The existence of a range of distributed and channelized flow mechanisms under larger ice bodies~~  
81 ~~similarly suggests a range of response times to input from surface melt water.~~

82 Seven measurements of dissolved solute chemistry taken from samples collected over the course  
83 of 2 days in 2011 at the terminus of Isunnguata Sermia, a major land-terminating west Greenland outlet  
84 glacier, potentially show a direct relationship between solute concentration and discharge (~~Graly et al.,~~  
85 ~~2014; Landowski, 2012~~)(Graly et al., 2014; Landowski, 2012). In this limited time series, solute  
86 concentration appears to peak at midafternoon, while discharge is high, and be minimal in the early  
87 morning hours, with total variation of <20%. To ~~further~~ investigate further whether a direct relationship  
88 exists between discharge and solute concentration ~~exists in the Isunnguata Sermia outlet of the western~~  
89 ~~Greenland Ice Sheet~~, we returned to the same site for a six day period of the summer of 2013, collecting  
90 8 samples per day for chemical analysis.

91

## 92 2. Field site

93 Water samples were collected from the terminus of the Isunnguata Sermia, ~~a major land-~~  
94 ~~terminating~~ outlet of the ~~western~~ Greenland Ice Sheet (Figure 1). The outlet glacier ~~Isunnguata Sermia~~

95 occupies a deeply cut glacial valley, with surrounding hilltops >400 m above sea level. Deep, glacially-  
96 carved trenches continue under the ice sheet for more than 20 km into the interior, with where ice depths  
97 of greater than reach >1,000 m (Jezek et al., 2013)(Jezek et al., 2013). The Isunnguata Sermia outlet has a  
98 catchment that encompasses >2,400 km<sup>2</sup> of the ablation zone, making it one of the largest regional  
99 subglacial drainage basins in Western Greenland (Palmer et al., 2011)(Palmer et al., 2011). RegionalThe  
100 regional geology consists of primarily of Paleoproterozoic gneisses and granitoids (van Gool et al.,  
101 2002)(van Gool et al., 2002). The Isunnguata Sermia outlet is located 25 km from the town of  
102 Kangerlussuaq. It is the next outlet to the north of the Russell Glacier and feeds a separate glacial river  
103 system from the Watson River, providing a silicate bedrock substrate for subglacial chemistry.

104 Water emerges from a single location on the south side of Isunnguata Sermia's terminus front  
105 ~30m30 m above sea-level (Figure 1) and traverses a broad, >100 km long sandur to the fjord. Discharge  
106 of pressurized subglacial water creates a large upwelling capable of expelling water multiple meters into  
107 the air and, although no fully quantitative measurement could be made, peak discharge was estimated to  
108 exceed 500 m<sup>3</sup>s<sup>-1</sup> in the hundreds of m<sup>3</sup>s<sup>-1</sup>, as is consistent with typical summer discharge in the nearby  
109 Watson River (Hasholt et al., 2013). Ice-cored moraines and frozen outwash shape the course of outlet  
110 waters. On the sandur, frozen outwash channels the water into a single thread, although the large  
111 sediment load creates rapidly changing channel and bed geometry. Near the terminus, the frozen outwash  
112 of the sandur is elevated ~2-4 meters above the discharging stream. The main stream is also fed by minor  
113 ice surface melt streams. A small stream that runs along the south lateral margin of the glacier joins the  
114 main terminal outlet stream just below the primary upwelling site.

115 This work was performed in the context as part of several other a wider program of coordinated  
116 studies of the Isunnguata Sermia terminus region. Hot water boreholes along a transect from the outlet  
117 to 40 km in the interior upstream have provided data regarding water pressure (Meierbachtol et al., 2013),  
118 ice temperature (Harrington et al., 2015), subglacial water chemistry (Graly et al., 2014), and mass balance

119 between subglacial sediment and rock (Graly et al., 2016). More limited datasets from Isunnguata  
120 Sermia's terminal and lateral outlets were reported for the 2010, 2011, and 2012 seasons (Graly et al.,  
121 2014). The work reported here is based on samples and data collected over a 6 day period from July 16<sup>th</sup>  
122 to July 21<sup>st</sup>, 2013.

123

### 124 3. Methods

#### 125 3.1 Water Sampling

126 ~~Water sampling began at 8:00 hours local time on July 16<sup>th</sup>, 2013 and continued in 3 hour~~  
127 ~~increments through 20:00 hours on July 21<sup>st</sup>, 2013. Samples were collected by lowering a liter bottle~~  
128 ~~attached to a pole into discharging waters within 400 m of the subglacial upwelling. During July 16<sup>th</sup> and~~  
129 ~~July 17<sup>th</sup>, samples were collected from the south bank of the outlet stream from the banks at the beginning~~  
130 ~~of the outwash plain (Figure 1). During July 17<sup>th</sup>, the main course of the river shifted so that location had~~  
131 ~~diminished flow and an emerging bank channeled waters from the lateral side stream to the location.~~  
132 ~~Commencing at 14:00 hours on July 18<sup>th</sup>, sampling was relocated above the lateral side stream on the~~  
133 ~~banks of the terminal moraine (Figure 1). The sampling location was not subsequently changed. Excepting~~  
134 ~~periods where the emerging bank channeled lateral stream water to the first location, both locations~~  
135 ~~sampled water from the main subglacial outlet and should produce comparable results.~~

136 ~~Upon collection, 125 ml of water sample were pumped through 0.1  $\mu$ m nylon filters, with filtered~~  
137 ~~water and filter papers saved for laboratory analyses. A colorimetric alkalinity test, a conductivity~~  
138 ~~measurement, and a pH measurement were performed on the remaining unfiltered sample. Alkalinity~~  
139 ~~tests were performed with a Hach Model AL AP alkalinity test kit. Results of field alkalinity tests were only~~  
140 ~~accurate to 25  $\mu$ M. Alkalinity was therefore also calculated by charge balance from the other measured~~  
141 ~~ions. pH measurements and conductivity measurements were performed with Beckman Coulter  $\Phi$ 460~~  
142 ~~multi-parameter meter. pH was measured using a low ionic strength probe.~~

143 ~~Subsequent water analyses were performed in the University of Wyoming Aqueous Geochemistry~~  
144 ~~Lab. Concentrations of Si, Ca, Mg, Na, and K were measured on a Perkin-Elmer Elan 6000 inductively~~  
145 ~~coupled plasma quadrupole mass spectrometer (ICP-MS). Concentrations of  $\text{SO}_4^{2-}$ ,  $\text{Cl}^-$ ,  $\text{NO}_3^-$ , and  $\text{F}^-$  were~~  
146 ~~measured on a Dionex ICS-500 ion chromatograph. The filter papers were dried and weighed to assess~~  
147 ~~suspended load.~~

148

### 149 **3.2 Discharge**

150 Discharge measurements of the outlet were difficult ~~to obtain~~. There is no exposed bedrock near  
151 the stream to act either as an elevation reference or to stabilize the river bed. Obtaining accurate cross  
152 profiles of the stream was prohibitively dangerous, with high flows, collapsing banks, and a considerable  
153 flux of mobile ice blocks. Attempts to install a stage pole were frustrated by considerable stage variation  
154 over time associated with cutting and filling of the ~~riverstream~~ bed ~~and banks~~. Once the stream opens out  
155 from its restriction by remnant glacier ice near the upwelling, stage is poorly correlated with discharge.  
156 The stream instead scours sediment during the rising limb and deposits it on the trailing limb of the daily  
157 hydrograph. It was decided to assess only relative discharge. This was aided by repeat photography from  
158 two fixed locations.

159 Hourly stream photography began at 10:00 hours on July 18<sup>th</sup> and continuing through 20:00 hours  
160 on July 21<sup>st</sup>. From one vantage point, the central upwelling of subglacial water was photographed from  
161 the south, as it poured out from around the moraine. This vantage captured a ~~~1-meter-high~~, mid-  
162 channel naled formed from freezing of outlet waters during winter months. The naled was variably  
163 covered or exposed as discharge varied and acted as a stream gauge in this respect. This portion of the  
164 stream is restricted by frozen sediment and stream height is controlled by discharge.

165 A second vantage, from a rise above the south bank, captured a ~200m long stretch of the outlet  
166 stream. In this portion of the stream, increased discharge caused scour and expansion of the stream's

167 active channel. Photography allowed assessment of relative active channel width. Large waves and faster  
168 velocities are confined to this active channel, ~~allowing fairly unambiguous, though qualitative,~~  
169 ~~determination of which portions of an overhead photograph comprise the active channel.~~ The distance  
170 between the upstream end of a persistent, mid-stream point bar and a distinct feature on the south shore  
171 was measured on each photograph (Figure 1). The length of the portion of this transect characterized by  
172 large waves and flow features was also measured, allowing for the calculation of the percentage fraction  
173 of the stream width contained by the active channel. On most of the photographs, the break between the  
174 large standing waves and the surrounding quiescent flow was unambiguous. The second vantage also  
175 allowed assessment of flow state and Froude number from the presence of features such as standing  
176 waves.

177 During the first two days of the sampling period, stream surface velocity was measured by  
178 ~~repeated timing the motion of floating ice and other stream surface features down a 100 m section of the~~  
179 ~~stream, repeatedly running in pace with the movement of the stream surface along a 100 m stretch of the~~  
180 ~~sandur. This was accomplished by observing visually consistent mobile features of the stream, such as~~  
181 ~~lineations within wave forms and small pieces of floating ice.~~ Measurements were taken during morning,  
182 afternoon, and evening stages to assess variation in velocity associated with high and low flow. During  
183 this earlier period, changes in the width of the active channel and volume of the water pouring over the  
184 naled were also observed (though without systematic photography from a consistent vantage).

185

### 186 **3.32 Interior Surface Melt**

187 In order to compare variation in terminus discharge to melt in the surface interior, we ~~are~~ also  
188 ~~including~~ consider discharge measurements from an interior ice sheet surface stream. The stream was  
189 gauged during ~~the summer~~ June of 2012, so the data are not directly comparable to the measurements  
190 collected in 2013. However inasmuch as interior melt is primarily controlled by insolation, the stream's



191 variation likely represents a typical pattern for the timing and scaling of diurnal summer surface melt  
192 fluctuations. Coincidentally, the progression of the Greenland Ice Sheet melt season was fairly comparable  
193 between June 2012 and July 2013, with ablation rates of 6-10 Gt per day during both periods (Langen et  
194 al., 2013). The supraglacial stream was gauged during a period in which bare ice was melting, so water  
195 retention in snow did not affect its hydrology.

196 The surface stream was located at 67.2°N and 49.8°E, ~25 km from the terminal outlet. Stream  
197 height was gauged with a calibrated pole drilled into ice. Surface velocity was measured by timing floating  
198 ice along a course of known distance. Cross-sectional area was directly measured in the region where the  
199 gauge was emplaced and calibrated to gauge height. Transect slope was measured by pole and automatic  
200 level. Six measurements of surface velocity used to calculate an average Manning coefficient from the  
201 measured slope and hydraulic radius of the stream. Discharge was then calculated from change in  
202 ~~gage~~gauge height. Stage height was measured every half hour or hour for a period from 11:30 ~~6/June~~  
203 ~~18/12 2012~~ to 20:00 ~~6/June 21/12 2012~~. During June ~~18<sup>th</sup>, 19<sup>th</sup>~~ ~~18, 19~~, and ~~20<sup>th</sup>~~ ~~20~~, sunny weather  
204 predominated; June ~~21<sup>st</sup>~~ ~~21~~ had rainy, cooler weather.

205

### 206 **3.3 Water Sampling**

207 Water sampling of Isunnguata Sermia's terminal outlet began at 8:00 hours local time on July 16,  
208 2013 and continued in 3 hour increments through 20:00 hours on July 21, 2013. Temperatures in the  
209 interior ablation zone measured at PROMICE KAN M weather station stayed at ~0.5 positive degrees per  
210 day over July 16-18 and steadily rose to 1.3 positive degrees per day over July 19-21. Samples were  
211 collected by lowering a liter Nalgene polypropylene bottle attached to an adjustable-length pole into  
212 discharging waters within 400 m of the subglacial upwelling. The bottle was dipped and rinsed in flowing  
213 stream water prior to final sample collection. Samples were initially collected from the south bank of the  
214 outlet stream, from the banks at the beginning of the outwash plain (Figure 1; Site 1). During July 17, the

215 main course of the river shifted so that location had diminished flow and an emerging bank channeled  
216 waters from the lateral side stream to the location. Commencing at 14:00 hours on July 18, sampling was  
217 relocated above the lateral side stream on the banks of the terminal moraine (Figure 1; Site 2). The  
218 sampling location was not subsequently changed. Excepting periods where the emerging bank channeled  
219 lateral stream water to the first location, both locations sampled water from the main subglacial outlet  
220 and should produce comparable results.

221 Upon collection, 125 ml of each water sample were pumped through 0.1  $\mu\text{m}$  nylon filters, with  
222 filtered water and filter papers saved for laboratory analyses. A colorimetric alkalinity test, a conductivity  
223 measurement, and a pH measurement were performed on the remaining unfiltered sample. Alkalinity  
224 tests were performed with a Hach Model AL-AP alkalinity test kit. Results of field alkalinity tests were only  
225 accurate to 25  $\mu\text{M}$ . Alkalinity was therefore also calculated by charge balance from the other measured  
226 ions. pH measurements and conductivity measurements were performed with Beckman-Coulter  $\Phi$ 460  
227 multi-parameter meter. pH was measured using a low ionic strength probe, with a three-point calibration  
228 employed daily.

229 Subsequent water analyses were performed in the University of Wyoming Aqueous Geochemistry  
230 Lab. Concentrations of Si, Ca, Mg, Na, and K were measured on a Perkin Elmer Elan 6000 inductively  
231 coupled plasma quadrupole mass spectrometer (ICP-MS). Concentrations of  $\text{SO}_4^{2-}$ ,  $\text{Cl}^-$ ,  $\text{NO}_3^-$ , and  $\text{F}^-$  were  
232 measured on a Dionex ICS 500 ion chromatograph. Element and ion analyses were measured together  
233 with procedural blanks, which were consistently measured below the lower limits of detection. The filter  
234 papers were dried overnight at 85° C and weighed to assess suspended load.

235

## 236 **4. Results**

### 237 **4.1 Discharge**

238 Over the four days during which repeat photographic observations were made, photographs of  
239 the naled show consistent minima at 8:00 hours, with the naled is mostly exposed, and a small volume of  
240 water overtopping a portion of the ice body (Figure 2). ~~During the first two days of observation~~On July 18  
241 ~~and 19~~, the naled was completely covered by flowing water from 19:00 to 0:00 hours. On ~~the third day~~July  
242 ~~20~~, it was covered from 16:00 hours, and remained covered for the remainder of the study period.

243 Maximum discharge is harder to determine from observations of the naled alone. Once the naled  
244 is completely covered in water, visual interpretation of maximum flow is ambiguous. Some discrimination  
245 can be made based on ~~the~~ height of the covered naled feature compared to the surrounding waves and  
246 ~~the~~ angle at which the water pours over the naled (greater flows overtop the naled at a lower angle). From  
247 these features, maximum stream flow ~~appears~~appeared to occur at 21:00 hours on July ~~18<sup>th</sup>~~18 and ~~19<sup>th</sup>~~19,  
248 and 20:00 hours on July ~~20<sup>th</sup>~~20.

Formatted: Superscript

249 Standing waves are observed at all flows (Figure 2), although substantial differences in wave and  
250 surface morphology were noted during waxing and waning phases, with rougher water in waning flow  
251 and smoother water in waxing flow. The roughness change may represent a change in the sediment load  
252 of the river between the erosive waxing stage and the depositional waning stage. The persistence of  
253 standing waves implies near critical flow conditions, or a Froude number approximately 1, for the entire  
254 study period. Measurements of stream velocity showed surface speeds of  $2.86 \pm 0.12$  m/s ( $2\sigma$ ,  $n=6$ ).  
255 Variation in velocity between morning and evening stages was within measurement error. ~~Based on~~  
256 ~~calculations from a Froude number of 1, stream depths of 0.5–0.9 m are suggested; these depth estimates~~  
257 ~~were supported by observing ice blocks rolling or bouncing down the flow. The lack of~~The lack of  
258 relationship between stage and discharge and velocity has been noted before in sediment laden glacial  
259 rivers (Humphrey and Raymond, 1994).

Field Code Changed

260 ~~Since neither stream velocity nor depth change with discharge, variations in discharge are~~  
261 ~~accommodated by changes in the width of the active channel.~~Based on calculations from a Froude number

262 of 1 (i.e. stream velocity squared is equal to stream depth times acceleration from gravity) and assuming  
263 a total velocity within 20% of surface velocity, stream depths of 0.5 - 0.9 m are suggested. These depth  
264 estimates were supported by observing ice blocks rolling or bouncing down the flow. The active channel's  
265 approximately constant stream velocity and persistent standing waves suggest a fairly constant stream  
266 depth. Wide areas of shallow slow water remained present during low flows and the total surface area of  
267 the stream remained approximately constant. Pole probing of these shallow areas suggests 10 to 20 cm  
268 depths. Because the active channel has an order of magnitude greater discharge per transect meter than  
269 the stream's marginal areas ~~and changes in active channel water velocity were not observed,~~ we infer  
270 that the cross-sectional area of the active channel is the primary control on discharge. Rising discharge is  
271 accommodated by scouring on the margins of the active channel; falling discharge is accommodated by  
272 deposition.

273 Assessment of the active channel width from repeated photography shows substantial differences  
274 between morning hours (~5:00-10:00), where 20-30% of the stream is comprised of active channel  
275 characteristics, and late afternoon / evening hours (~18:00-0:00) where >40% of the stream is comprised  
276 of active channel characteristics. These observations are generally consistent with assessments of the  
277 height of water pouring over the naled (Figure 3). Though repeated photography from a consistent  
278 vantage was not performed during the first two days of the study, field observations and photographs  
279 from that period show similar changes in the active channel width and naled overflow.

280

#### 281 4.2 Interior Surface Stream

282 The calculated Manning coefficient for the interior stream was  $0.0117 \pm 0.0018$  ( $2\sigma$ ). Discharge  
283 ~~measured in the interior ice surface stream~~ its discharge varied by as much as an order of magnitude  
284 during the course of diurnal cycles, with low values as small as  $0.3 \text{ m}^3\text{s}^{-1}$  and high values greater than  $3.5$   
285  $\text{m}^3\text{s}^{-1}$  (Figure 3). Minimum stage heights consistently occurred around 4:00 hours. Maximum stage heights

286 consistently occurred at 14:00 or 15:00 hours. These data contrast with our observations of water pouring  
287 over the naled. The naled minimum occurred approximately 4 hours later than minimum of surface melt.  
288 The naled maximum occurred approximately 6 hours later than maximum surface melt. This delay is  
289 representative of the integration of the travel time delays from the entire glacier catchment.

290

### 291 4.3 Water Analyses

292 ~~Sampled~~The sampled waters ~~are~~were generally chemically dilute, with  $292 \pm 50$  micromoles per  
293 liter dissolved solutes (Table 1). Ca ~~is~~was the dominant cation, followed by Na, K, and Mg (Figure 4). Mg  
294 abundances ~~are~~were an order of magnitude lower than the other major cations. Dissolved Si  
295 ~~occurs~~occurred at comparable abundance to Na. Standard deviations of the mass spectrometer  
296 measurements were  $<1\%$  of the measured value. Bicarbonate (measured as alkalinity) ~~is~~was the dominant  
297 anion.  $\text{SO}_4^{2-}$  and  $\text{Cl}^-$  are detected in all samples, but occur at an order of magnitude lower concentration.  
298 Trace amounts of  $\text{NO}_3^-$  and  $\text{F}^-$  were detected in some samples, at values an order of magnitude below  
299  $\text{SO}_4^{2-}$  and  $\text{Cl}^-$  concentrations (Figure 4). On average, field alkalinity measurements ~~exceed~~exceeded the  
300 alkalinity estimates from charge balance by  $25 \pm 14 \mu\text{M}$  ( $2\sigma$ ). Some over-measurement in the field titration  
301 is expected, as the value is recorded at the level where the color tracer disappears (and therefore is a  
302 maximum compared to previous drop). Charge imbalance may also result from absorption of  $\text{H}^+$  particles  
303 to suspended sediment in unfiltered water. Field electrical conductivity measurements ~~show~~showed  
304 similar results to the sum of laboratory analyses measured inorganic ions ( $p < 0.0001$ ) (Figure 4). Suspended  
305 sediment concentration ~~does~~did not show a consistent correlation or anti-correlation with dissolved load  
306 (Figure 4).

307 Relative~~The relative~~ abundances of cation species ~~is~~are comparable to measurements taken at  
308 the Isunnguata Sermia terminus in the summer of 2011 (~~Graly et al., 2014~~)(Graly et al., 2014). The  $\text{SO}_4^{2-}$   
309 /alkalinity ratios are diminished compared to those measured in 2011, but are comparable to those found

310 in samples collected in 2010 and 2012. The concentrations of suspended sediment are similar to those  
311 observed at nearby Leverett Glacier during the summer of 2010 (Cowton et al., 2012).

Field Code Changed

312 When normalized to average concentration, the magnitude and timing of cation and silica  
313 concentration variation ~~is~~were highly consistent between species over time (Figure 5). Covariation of all  
314 cation and Si species is statistically significant with  $p < 0.05$ . Covariations of K-Mg, K-Si, and Na-Si have  $p$ -  
315 values ranging from 0.01 to 0.05; all others are  $< 0.0001$ . All cations and silica concentrations  
316 ~~follow~~followed a diurnal pattern, with higher concentrations present during morning and early afternoon  
317 hours and significantly lower concentrations present during later afternoon and evening hours. In several  
318 of the studied cycles, large changes in total concentration ~~are~~were limited to the 20:00 and 23:00 hours  
319 samples, which are substantially lower than the other samples collected throughout the day.

320 ~~There are two major deviations from the diurnal pattern.~~ The 11:00, 14:00, 17:00, and 20:00  
321 samples from July 17<sup>th</sup> ~~have~~had substantially lower solute concentrations than would be otherwise  
322 suggested by diurnal fluctuations observed elsewhere in the record. This corresponds with the period  
323 during which an emerging bank partially separated site 1 from the main channel allowing a surface-fed  
324 side stream to substantially dilute the water.

325 At 2:00 on July 20<sup>th</sup> 20, there ~~is~~was a  $> 60\%$  spike in total concentration of all cations. Similar, but  
326 smaller magnitude spikes ~~are~~were also present ~~in~~during the ~~2:00 samples~~other four measured periods of  
327 ~~July 19<sup>th</sup> and 21<sup>st</sup> and the July 16<sup>th</sup> 23:00 sample~~waning flow. The ~~most clearly expressed~~largest of these  
328 spikes (~~July 20<sup>th</sup> and 21<sup>st</sup>~~) are substantially more expressed in Na and K concentrations than in Ca, Mg, or  
329 Si. (Figure 5). During the ~~July 21<sup>st</sup> final measured overnight~~ spike, ~~the spike in~~elevated concentrations of  
330 Mg and Si ~~appears to precede the spike in~~preceded those of Ca, Na, and K ~~in that it appears during the~~  
331 ~~previous sampling by a 3-hour measuring~~ period. ~~Large~~The large variability in the magnitude of these spikes  
332 suggests that the 3-hour sampling schedule was insufficiently frequent to characterize them entirely.

Formatted: Font: Tahoma, 10 pt, Font color: Black

333 Anions generally follow similar patterns, but with greater variability (Figure 4). In particular, Cl<sup>-</sup>  
334 does not co-vary with other ions toward the end of the record. ~~The; the 2:00 spike on July 18<sup>th</sup> coincides~~  
335 ~~with a drop in SO<sub>4</sub> concentration; the spike on the 20<sup>th</sup> 20~~ coincides with a drop in Cl<sup>-</sup> concentration.  
336 ~~SO<sub>4</sub>SO<sub>4</sub><sup>2-</sup> concentrations generally only increased very~~ minimally ~~increase~~ during the waning flow spikes,  
337 and in one case declined. During the final spike, SO<sub>4</sub><sup>2-</sup> rises during the 11:00 period, together with Mg and  
338 Si.

Formatted: Superscript

339 Excluding ~~these anomalies~~ the spikes that occur during waning flow, the highest concentration of  
340 dissolved solids occurs at 11:00 on July ~~16<sup>th</sup>, 19<sup>th</sup>, 20<sup>th</sup> 16, 19, 20, and 21<sup>st</sup> 21~~ (Figure 5). On July ~~17<sup>th</sup> 17 and~~  
341 ~~18<sup>th</sup> 18~~, the 11:00 sample was likely diluted by the side stream (which was a significant component of flow  
342 to site 1 during that period). Concentration minima are reached at 23:00 hours on July ~~17<sup>th</sup> 17 through~~  
343 ~~20<sup>th</sup> 20~~. On July ~~16<sup>th</sup> 16~~, the ~~minimum~~ minimum occurs in the 20:00 sample. The ~~size of the diurnal variation~~  
344 ~~varies from maximum solute concentration ranged between~~ 22% to 49% ~~of larger than~~ the ~~lowest~~  
345 ~~value~~ minimum concentration, with an average daily ~~range~~ value of 31 ± 9%.

Formatted: Superscript

346

## 347 5. Discussion

### 348 5.1 Discharge and Outlet Stream Observations

349 Observations from oblique photography suggest large diurnal changes in discharge. ~~Width~~ The  
350 width of the active channel, with deeper faster water, approximately doubles in the course of the day  
351 (Figure 3b). An approximate doubling of discharge is also suggested by observations of the midstream  
352 naled. The naled is of comparable scale to the depth of the stream (both order of 1 meter). Its exposure  
353 during low flow and burial during high flow suggests a change in stage comparable to its height. At the  
354 naled site, increased width of active channel flow is restricted by ice. Increases in flow height at the naled  
355 location are therefore approximately equivalent to increases in active channel width downstream.

356 During high flows, diurnal increases in discharge of up to 50% of base value are observed in the  
357 Watson River at Kangerlussuaq, where a bridge over a narrow gorge has allowed for the construction of  
358 a reliable gauge (Hasholt et al., 2013)(Hasholt et al., 2013).~~As the Watson River is 20-30 km from its glacial~~  
359 ~~outlet sources and integrates several independent glacial outlet streams, these diurnal cycles are likely~~  
360 ~~muted compared to their expression at the ice margin. Larger diurnal changes are therefore expected~~  
361 ~~directly at glacier outlet termini. Contrastingly, Smith and others-. Contrastingly, Smith and others~~  
362 ~~(2015)(2015) found minimal diurnal variation in discharge at Isunnguata Sermia terminus. However, as~~  
363 Smith and others estimated discharge based solely on the surface area of the outlet stream water, their  
364 analysis missed the variation in the width of the active channel and height of its flow over static features  
365 that we present. Based on our limited observational record, it appears that changes in discharge at the  
366 Isunnguata Sermia terminus are similar or larger in magnitude to those recorded at the Watson River.

367

## 368 5.2 Diurnal Changes in Solute Flux

369 ~~The critical observation is that variability in the dissolved solute concentrations cannot be~~  
370 ~~explained by dilution alone. First, the scale of discharge variation is substantially larger than variation in~~  
371 ~~concentration of dissolved solutes. Approximate width of the main channel doubles during diurnal cycles,~~  
372 ~~while concentrations of dissolved solutes only change by an average of 21-40% (Figure 5). Secondly,~~  
373 ~~maximum and minimum solute concentrations are offset from minimum and maximum discharge. Such~~  
374 ~~lags imply periods where solute concentration is increasing even as discharge rises and periods where~~  
375 ~~solute concentration is falling even as discharge falls.~~

376 ~~Periods of in-phase changes between discharge and solute concentration suggest that increased~~  
377 ~~water flow is either stimulating increased water-rock interaction or allowing for release of stored water~~  
378 ~~(that has developed higher solute concentrations over longer residence times). While the single upwelling~~  
379 ~~structure of the terminus of Isunnguata Sermia implies local channelized flow, observations of water~~



380 pressures at interior sites (Meierbachtol et al., 2013) and hydrologic theory for low ice surface slopes  
381 (Werder et al., 2013) both suggest that much of the catchment interior has a linked cavity flow system.  
382 Linked cavity systems would allow for expansion of the basal hydrological system and flushing of long  
383 water residence time regions under high flow conditions.

384 ~~Sudden~~The lag between relative discharge minima and maximum solute concentrations is similar  
385 to other glacial and non-glacial systems where waters of differing response times are merged into a single  
386 stream. Similar lags are observed when groundwater, soil water, and surface flow mix into a stream after  
387 a rainfall event (Evans and Davies, 1998). Substantial lags between discharge and solute flux are also  
388 observed where glacial melt mixes with groundwater in a karstic system (Zeng et al., 2012) and in the  
389 mixing of marginal melt streams with a subglacial pool in a polythermic setting (Skidmore and Sharp,  
390 1999). Even in a small alpine system, observable chemical differences between the leading and lagging  
391 limbs of the discharge hydrograph have been attributed to mixing of englacial and subglacial waters  
392 (Tranter and Raiswell, 1991).

393 In the context of the Greenland Ice Sheet, periods of in-phase change between discharge and  
394 solute concentration are best explained by the flushing of a linked-cavity or other distributed hydrological  
395 system as hydraulic pressure rises. Seasonal changes in ice velocity in this sector of the Greenland ice  
396 sheet have been linked to a combination of distributed and channelized subglacial flow (Bartholomew et  
397 al., 2011). Dye-tracing of the hydrological connections between moulins and glacial outlets has also  
398 indicated a mixture of subglacial flow regimes (Chandler et al., 2013). Though the single upwelling  
399 structure of the terminus of Isunnguata Sermia implies locally channelized flow, observations of water  
400 pressures at interior sites (Meierbachtol et al., 2013) and hydrologic theory for low ice surface slopes  
401 (Werder et al., 2013) both suggest that much of the catchment interior has a distributed flow system.

402 The sudden increases in solute concentration during waning flow suggest that discharge from  
403 subglacial regions with a high ~~concentration~~ concentrations of dissolved solutes is triggered when a

404 threshold is reached. ~~Multiple triggering~~To our knowledge, the release of stored water during waning flow  
405 has only been previously documented on a multiday scale (Anderson et al., 2003), whereas here it  
406 occurred as part of the diurnal melt cycle. For slow-moving, distributed subglacial water to be both flushed  
407 by rising hydraulic pressures and released from storage by falling hydraulic pressures, multiple subglacial  
408 flow paths or mechanisms are plausible. must be operating simultaneously.

409 The contrast in solute chemistry between the long-wavelength increases in solute concentration  
410 (in which, all major chemical constituents respond comparably) and the waning flow spikes (in which Na,  
411 K, and alkalinity dominate) suggests differing subglacial environments and mechanisms. Na- and K-  
412 dominated waters likely form in settings where water-rock interactions occur only over a limited time,  
413 such that cation exchange occurs on fresh feldspar and mica surfaces, but complete silicate dissolution  
414 and clay precipitation does not occur (Blum and Stillings, 1995; Graly et al., 2014). The lack of constituents  
415 derived reactive accessory minerals such as pyrite (i.e.  $\text{SO}_4^{2-}$ ) implies the waters were reacting with  
416 sediment that has been depleted of accessory minerals. Such accessory mineral depletion can occur if  
417 sediment residence time in the subglacial system is sufficiently long (Graly et al., 2014). Sampling of  
418 sediment beneath ice boreholes has shown the greatest chemical depletion in portions of the ice sheet  
419 most influenced by distributed flow (Graly et al., 2016).

420 This variation in water chemistry suggests that the spike of chemical solutes comes from water  
421 that has temporarily entered regions of distributed flow as a part of a diurnal cycle. Modeling of subglacial  
422 water pressures suggests that near the ice sheet margin, water flows from conduits to the distributed  
423 cavity system at high conduit water pressures and back to conduits at low pressures (~~Meierbachtol et al.,~~  
424 ~~2013~~)(Meierbachtol et al., 2013). ~~Solute~~The spikes in solute concentration ~~spikes~~ result from the crossing  
425 of a pressure threshold ~~allowing~~that allows water stored during high flow to suddenly enter the glacial  
426 outlet system.

427 Solute concentration spikes might also be explained by creep closure of linked cavities that  
428 opened during high flow and expulsion of remaining solute-concentrated water. Anderson and others  
429 (2003) proposed a similar creep closure mechanism to explain increases in solute concentration during  
430 waning flow that occurred on a multiday scale in a mountain glacier setting. Following the Glenn-Nye  
431 relation, the rate of creep closure of ice scales to approximately the third power of effective pressure  
432 (~~Cuffey and Paterson, 2010~~)(Cuffey and Paterson, 2010). Differences in timing of these effects between  
433 ice sheets and mountain glaciers can therefore be explained by differences in ice thickness.

434 ~~Relative dominance of Na and K in these spikes is consistent with water-rock interactions~~  
435 ~~occurring only over a limited time, such that cation exchange occurred on fresh feldspar and mica surfaces~~  
436 ~~but complete silicate dissolution and clay precipitation did not (Blum and Stillings, 1995; Graly et al., 2014).~~  
437 ~~Contrastingly, constituents associated with weathering of reactive accessory minerals such as pyrite and~~  
438 ~~calcite (especially SO<sub>4</sub>) are minimally expressed. This implies that the spikes' composition reflects waters~~  
439 ~~that have rapidly passed through reactive sediment that is depleted of accessory minerals. Such accessory~~  
440 ~~mineral depletion can occur if sediment residence time in the subglacial system is sufficiently long (Graly~~  
441 ~~et al., 2014). Sampling of sediment beneath ice boreholes has shown the greatest chemical depletion in~~  
442 ~~portions of the ice sheet most likely to be influenced by distributed flow (Graly et al., 2016). This suggests~~  
443 ~~that the spike of chemical solutes comes from water that has temporarily entered regions of distributed~~  
444 ~~flow as a part of a diurnal cycle.~~

445

## 446 6. Conclusions

447 A semi-quantitative relative discharge record can be constructed through hourly photographic  
448 monitoring of the static and dynamic features of a large, sediment laden glacial outlet stream. These  
449 assessments ~~showsuggest~~ large diurnal changes in discharge over the ~~six-day~~ study period at the  
450 Isunnguata Sermia outlet of the Greenland Ice Sheet (c.f. Smith et al., 2015). Simultaneously collected

451 chemical measurements show substantially smaller fluctuation in dissolved load; thus this Greenland  
452 outlet glacier does not show the discharge-driven dilution of solute concentration that is common in  
453 smaller ice masses. Periods where dissolved solute ~~concentration~~concentrations increase and decrease  
454 along with discharge, and abrupt and variable increases in solute concentration during waning flow imply  
455 that significant contributions to the solute load is made by changes to the routing and storage of  
456 meltwater in the subglacial system over the course of the day. In particular, these results indicate  
457 considerable diurnal exchange of water ~~diurnally~~ between the conduit and linked cavity drainage systems,  
458 as well as implying threshold pressure conditions for these exchanges.

459

460 *Acknowledgements.* This work would not have been possible without funding from the Greenland  
461 Analogue Project (SKB, Posiva, NWMO) and NSF grant ARC-0909122. Janet Dewey assisted with laboratory  
462 analyses. Data from the Programme for Monitoring of the Greenland Ice Sheet (PROMICE) were provided  
463 by the Geological Survey of Denmark and Greenland (GEUS) at <http://www.promice.dk>. Thoughtful  
464 reviews by editor Rob Bingham and an anonymous referee greatly improved the manuscript.

465

#### 466 Cited References

- 467 Anderson, S.P., 2005. Glaciers show direct linkage between erosion rate and chemical weathering fluxes. *Geomorphology* 67, 147-157.
- 468 Anderson, S.P., Drever, J.I., Humphrey, N.F., 1997. Chemical weathering in glacial environments. *Geology*
- 470 25, 399-402.
- 471 Anderson, S.P., Longacre, S.A., Kraal, E.R., 2003. Patterns of water chemistry and discharge in the glacier-
- 472 fed Kennicott River, Alaska: Evidence of subglacial water storage cycles. *Chemical Geology* 202,
- 473 297-312.
- 474 Blum, A.E., Stillings, L.L., 1995. Feldspar dissolution kinetics, in: White, A.F., Brantley, S.L. (Eds.), *Chemical*
- 475 *Weathering Rates of Silicate Minerals*. Mineralogical Soc Amer, Chantilly, pp. 291-351.
- 476 Bartholomew, I.D., Nienow, P., Sole, A., Mair, D., Cowton, T., King, M.A., Palmer, S., 2011. Seasonal
- 477 variations in Greenland Ice Sheet motion: Inland extent and behaviour at higher elevations. *Earth*
- 478 and *Planetary Science Letters* 307, 271-278.
- 479 Brown, G.H., 2002. Glacier meltwater hydrochemistry. *Applied Geochemistry* 17, 855-883.

Formatted: Indent: Left: 0", Hanging: 0.5", Line spacing: single

480 [Chandler, D.M., Wadham, J.L., Lis, G.P., Cowton, T., Sole, A., Bartholomew, I., Telling, J., Nienow, P.,](#)  
481 [Bagshaw, E.B., Mair, D., Vinen, S., Hubbard, A., 2013. Evolution of the subglacial drainage system](#)  
482 [beneath the Greenland Ice Sheet revealed by tracers. \*Nature Geoscience\* 6, 195-198.](#)  
483 Collins, D., 1995. Dissolution kinetics, transit times through subglacial hydrological pathways and diurnal  
484 variations of solute content of meltwaters draining from an alpine glacier. *Hydrological Processes*  
485 9, 897-910.

486 Collins, D.N., MacDonald, O.G., 2004. Year-to-year variability of solute flux in meltwaters draining from a  
487 highly-glacierised basin. *Nordic Hydrology* 35, 359-367.

488 Cowton, T., Nienow, P., Bartholomew, I., Sole, A., Mair, D., 2012. Rapid erosion beneath the Greenland  
489 ice sheet. *Geology* 40, 343-346.

490 Cuffey, K.M., Paterson, W.S.B., 2010. *The Physics of Glaciers*, 4th ed.

491 Drever, J.I., Hurcomb, D.R., 1986. Neutralization of atmospheric acidity by chemical weathering in an  
492 alpine drainage basin in the North Cascade Mountains. *Geology* 14, 221-224.

493 [Evans, C., Davies, T.D., 1998. Causes of concentration/discharge hysteresis and its potential as a tool for](#)  
494 [analysis of episode hydrochemistry. \*Water Resources Research\* 34, 129-137.](#)

495 Graly, J.A., Humphrey, N.F., Harper, J.T., 2016. Chemical depletion of sediment under the Greenland Ice  
496 Sheet. *Earth Surface Processes and Landforms* [In Press](#)41, 1922-1936.

497 Graly, J.A., Humphrey, N.F., Landowski, C.M., Harper, J.T., 2014. Chemical weathering under the  
498 Greenland Ice Sheet. *Geology* 42, 551-554.

499 Harrington, J., Humphrey, N.F., Harper, J.T., 2015. Temperature distribution and thermal anomalies along  
500 a flowline of the Greenland Ice Sheet. *Annals of Glaciology* 56(70), 98-104.

501 Hasholt, B., Mikkelsen, A.B., Nielsen, M.H., Larsen, M.A.D., 2013. Observations of runoff and sediment  
502 and dissolved loads from the Greenland Ice Sheet at Kangerlussuaq, West Greenland, 2007 to  
503 2010. *Zeitschrift für Geomorphologie* 57, sup. 2, 3-27.

504 Hindshaw, R.S., Tipper, E.T., Reynolds, B.C., Lemarchand, E., Wiederhold, J.G., Magnusson, J., Bernasconi,  
505 S.M., Kretzschmar, R., Bourdon, B., 2011. Hydrological control of stream water chemistry in a  
506 glacial catchment (Damma Glacier, Switzerland). *Chemical Geology* 285, 215-230.

507 Hodson, A., Tranter, M., Vatne, G., 2000. Contemporary rate of chemical denudation and atmospheric CO<sub>2</sub>  
508 sequestration in glacier basins: An arctic perspective. *Earth Surface Processes and Landforms* 25,  
509 1447-1471.

510 Humphrey, N.F., 1987. Coupling between water pressure and basal sliding in a linked-cavity hydraulic  
511 system, *The Physical Basis of Ice Sheet Modelling*. IAHS Publ. No. 170, pp. 105-118.

512 Humphrey, N.F., Raymond, C.F., 1994. Hydrology, erosion and sediment production in a surging glacier:  
513 Variegated Glacier, Alaska, 1982-83. *Journal of Glaciology* 40, 539-552.

514 Jezek, K., Wu, X., Paden, J., Leuschen, C., 2013. Radar mapping of Isunnguata Sermia, Greenland. *Journal*  
515 *of Glaciology* 59, 1135-1147.

516 Kamb, B., 1987. Glacier surge mechanism based on linked cavity configuration of the basal water conduit  
517 system. *Journal of Geophysical Research* 92, 9083-9100.

518 Landowski, C., 2012. *Geochemistry and subglacial hydrology of the West Greenland Ice Sheet*, MS Thesis,  
519 *Geology and Geophysics*. University of Wyoming.

520 [Langen, P.L., Ahlstrøm, A.P., Andersen, K.K., Andersen, S.B., Barletta, V., Box, J.E., M, C., Colgan, W.,](#)  
521 [Dybkjær, G., Fausto, R.S., Forsberg, R., Hansen, B., Hanson, S., Høyer, J.L., Sørensen, L.S., Tonboe,](#)  
522 [R.T., 2013. Polar Portal Season Report 2013. Available at:](#)  
523 [http://polarportal.dk/en/nyheder/arkiv/2013-season-report/.](http://polarportal.dk/en/nyheder/arkiv/2013-season-report/)

524 Meierbachtol, T., Harper, J., Humphrey, N., 2013. Basal drainage system response to increasing surface  
525 melt on the Greenland Ice Sheet. *Science* 341, 777-779.

Formatted: Indent: Left: 0", Hanging: 0.5", Line spacing: single

Formatted: Indent: Left: 0", Hanging: 0.5", Line spacing: single

Formatted: Indent: Left: 0", Hanging: 0.5", Line spacing: single

526 Mitchell, A.C., Brown, G.H., 2007. Diurnal hydrological - physicochemical controls and sampling methods  
527 for minor and trace elements in an Alpine glacial hydrological system. *Journal of Hydrology* 332,  
528 123-143.

529 Nye, J.F., 1976. Water flow in glaciers: Jokulhlaups, tunnels, and veins. *Journal of Glaciology* 17, 181-207.

530 Palmer, S., Shepherd, A., Nienow, P., Joughin, I., 2011. Seasonal speedup of the Greenland Ice Sheet linked  
531 to routing of surface water. *Earth and Planetary Science Letters* 302, 423-428.

532 Röhlisberger, H., 1972. Water Pressure in Intra- and Subglacial Channels. *Journal of Glaciology* 11, 177-  
533 203.

534 [Skidmore, M.L., Sharp, M.J., 1999. Drainage system behaviour of a High-Arctic polythermal glacier. \*Annals\*  
535 \*of Glaciology\* 28, 209-215.](#)

536 Smith, L.C., Chu, V.W., Yang, K., Gleason, C.J., Pitcher, L.H., Rennermalm, A.K., Legleiter, C.J., Behar, A.E.,  
537 Overstreet, B.T., Moustafa, S.E., Tedesco, M., Forster, R.R., LeWinter, A.L., Finnegan, D.C., Sheng,  
538 Y., Balog, J., 2015. Efficient meltwater drainage through supraglacial streams and rivers on the  
539 southwest Greenland ice sheet. *Proceedings of the National Academy of Sciences of the United*  
540 *States of America* 112, 1001-1006.

541 Tranter, M., Brown, G., Raiswell, R., Sharp, M., Gurnell, A., 1993. A conceptual model of solute acquisition  
542 by Alpine glacial meltwaters. *Journal of Glaciology* 39, 573-581.

543 [Tranter, M., Raiswell, R., 1991. The composition of the englacial and subglacial component in bulk  
544 meltwaters draining the Gornergletscher, Switzerland. \*Journal of Glaciology\* 37, 59-66.](#)

545 van Gool, J.A.M., Connelly, J.N., Marker, M., Mengel, F.C., 2002. The Nagssugtoqidian Orogen of West  
546 Greenland: Tectonic evolution and regional correlations from a West Greenland perspective.  
547 *Canadian Journal of Earth Science* 39, 665-686.

548 [Wadham, J.L., Tranter, M., Skidmore, M., Hodson, A.J., Priscu, J., Lyons, W.B., Sharp, M., Wynn, P., Jackson,  
549 M., 2010. Biogeochemical weathering under ice: Size matters. \*Global Biogeochemical Cycles\* 24,  
550 GB3025.](#)

551 Werder, M.A., Hewit, I.J., Schoof, C.G., Flowers, G.E., 2013. Modeling channelized and distributed  
552 subglacial drainage in two dimensions. *Journal of Geophysical Research: Earth Surface* 118, 1-19.

553 Yde, J.C., Knudsen, N.T., Hasholt, B., Mikkelsen, A.B., 2014. Meltwater chemistry and solute export from  
554 a Greenland Ice Sheet catchment, Watson River, West Greenland. *Journal of Hydrology* 519, 2165-  
555 2179.

556 Zeng, C., Gremaud, V., Zeng, H., Liu, Z., Goldscheider, N., 2012. Temperature-driven meltwater production  
557 and hydrochemical variations at a glaciated alpine karst aquifer: implication for the atmospheric  
558 CO<sub>2</sub> sink under global warming. *Environmental Earth Science* 65, 2285-2297.

Formatted: Indent: Left: 0", Hanging: 0.5", Line spacing: single

Formatted: Indent: Left: 0", Hanging: 0.5", Line spacing: single

Formatted: Indent: Left: 0", Hanging: 0.5", Line spacing: single

Formatted: Indent: Left: 0", Hanging: 0.5"

561 **Figures:**

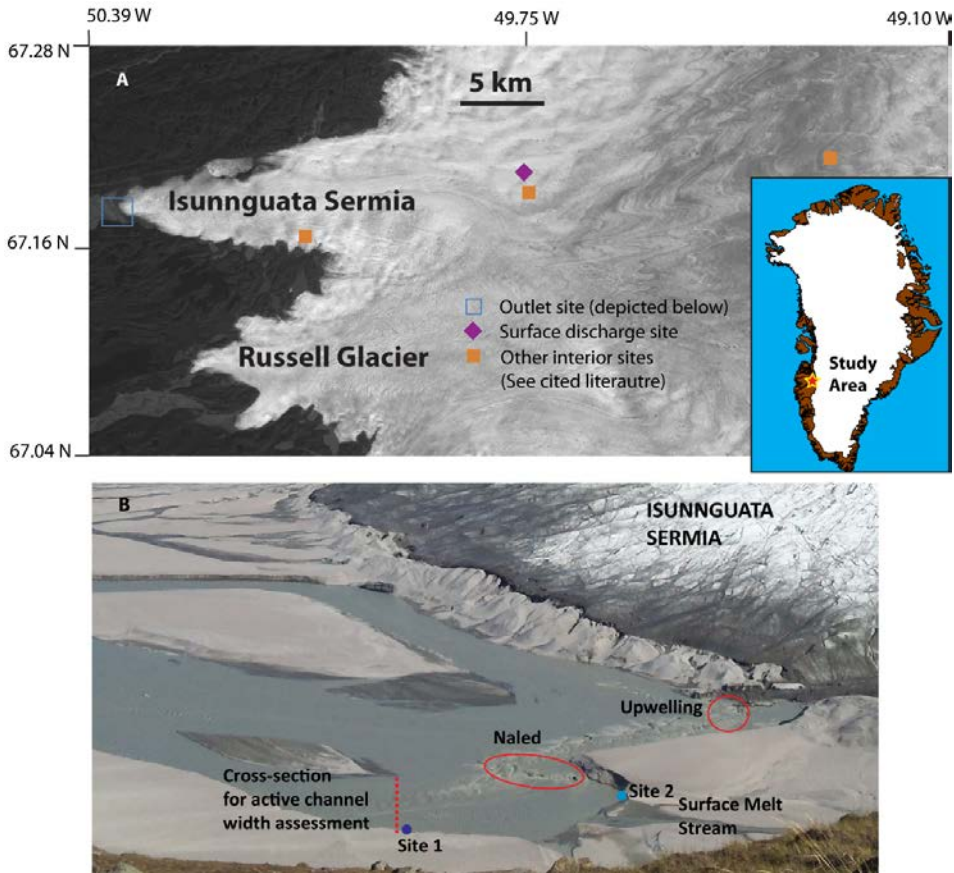

562  
563 **Figure 1.** A) Location of the study area on satellite imagery provided by polar geospatial datacenter. B)  
564 Overhead photograph of the study area (taken 7/22/13) with important July 2013 on an overlooking ridge,  
565 400 m above and 900 m away from the stream. Important sampling and observational features are  
566 labeled. Samples were collected at site 1 from 10:00 hrs on 7/16/13 through 11:00 hours on 7/18/13.  
567 Samples were collected at site 2 from 14:00 hrs on 7/18/13 through 20:00 hrs on 7/22/13. Beginning at  
568 10:00 hrs on 7/18/13, hourly photographs on the labeled naled and ~100 m cross-section were taken.

569

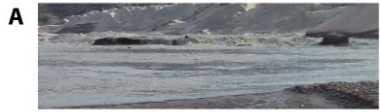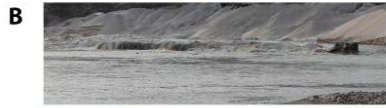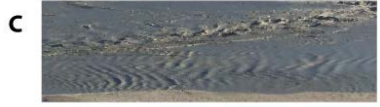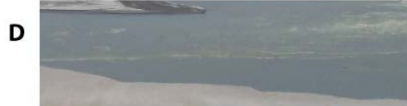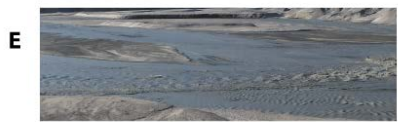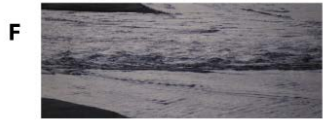

570



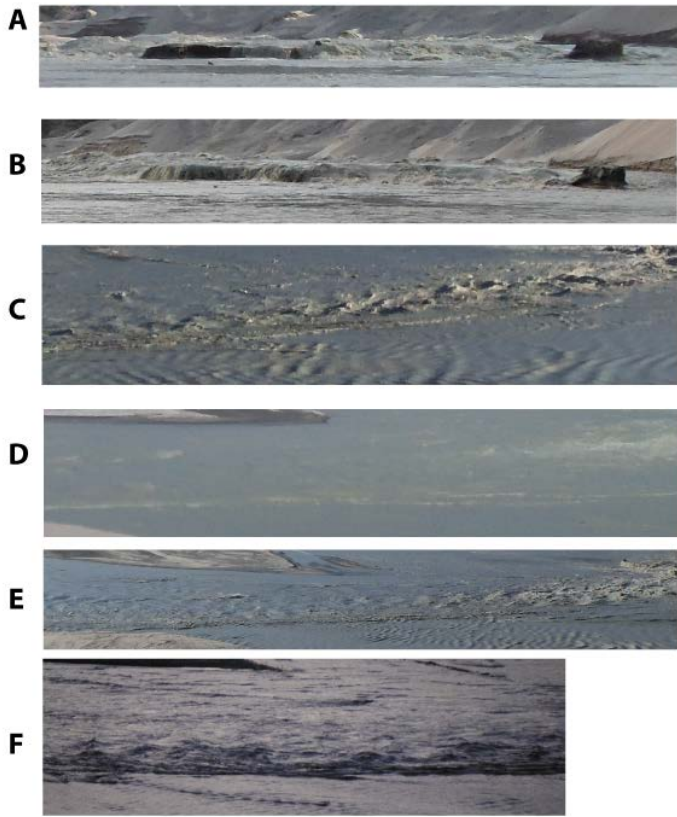

571  
572 **Figure 2.** Photographs of typical flow patterns in the Isunnguata Sermia outlet. A) Midstream naled  
573 exposed at during low flow (8:00). B) Midstream naled covered during high flow (21:00). C-F show [images](#)  
574 [of flow captures from the overhead vantage](#) during low (8:00), waxing (14:00), high (21:00) and waning  
575 (0:00) stages. Waxing and waning stages show different wave morphology but maintain standing wave  
576 features.

577

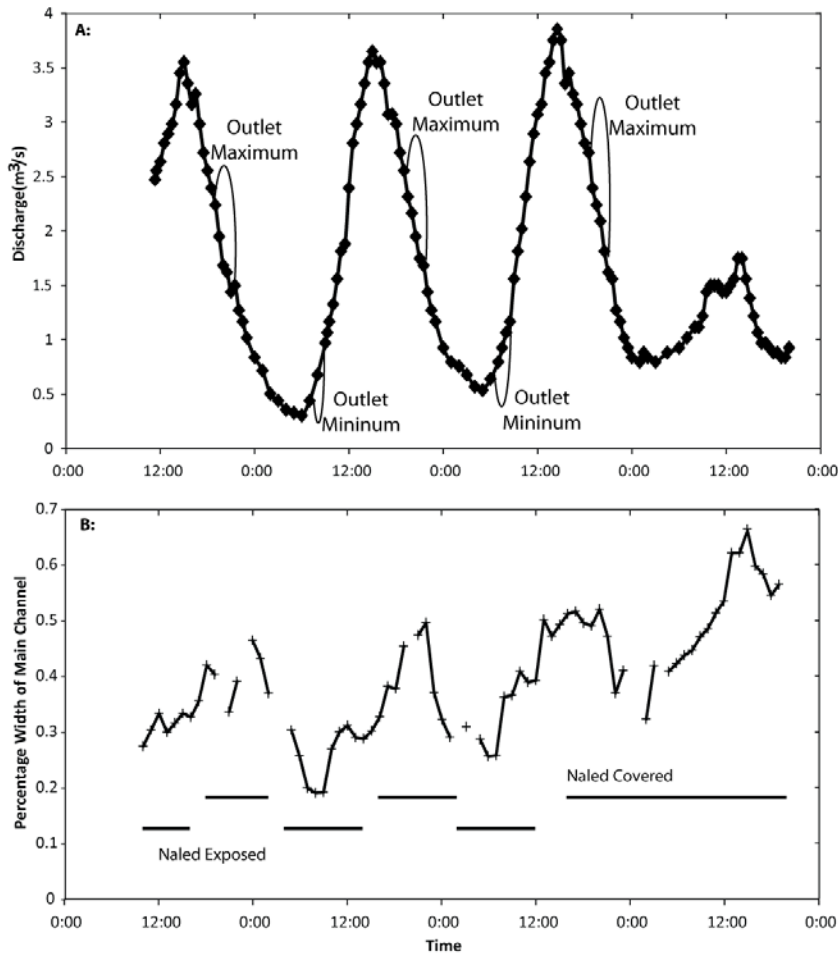

578  
 579 **Figure 3.** A) Measured discharge in an interior surface stream over a 4 day period in 2012 compared to  
 580 time ranges of maximum and minimum discharge as suggested by qualitative observation of flow volumes  
 581 over midstream naled ice in the outlet of Isunnguata Sermia during the study period. B) Assessment of  
 582 percentage of distance between a point bar and the shore that is characterized by large waves suggestive  
 583 of deep, fast flow. Periods of time where the midstream naled is exposed and covered are included for  
 584 comparison.

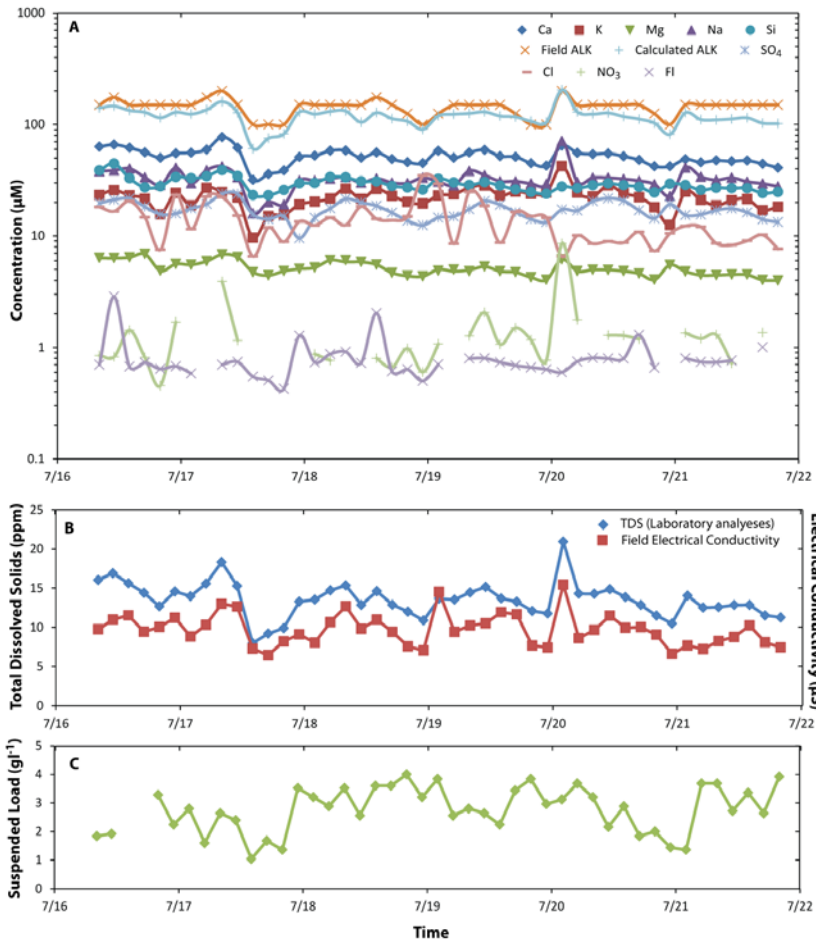

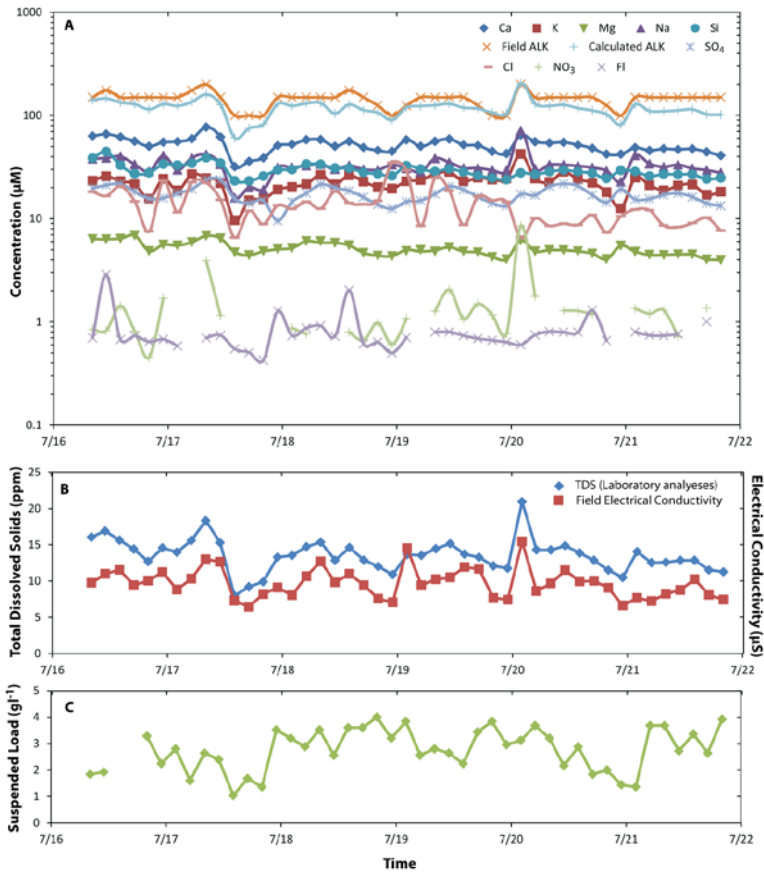

587  
 588 **Figure 4.** A) Concentration of dissolved constituents in sampled waters over time, including laboratory  
 589 measurements of cations and Si by ICP-MS, anions by ion chromatography, and field measurements of  
 590 alkalinity (ALK). Alkalinity as calculated by charge balance is also depicted. B) Total dissolved solids from  
 591 the sum of the laboratory measurements and charge balance alkalinity (HCO<sub>3</sub>) compared to field  
 592 conductivity measurements. Co-variation is statistically significant ( $p < 0.0001$ ). C) Dry weight of suspended  
 593 sediment on filters.

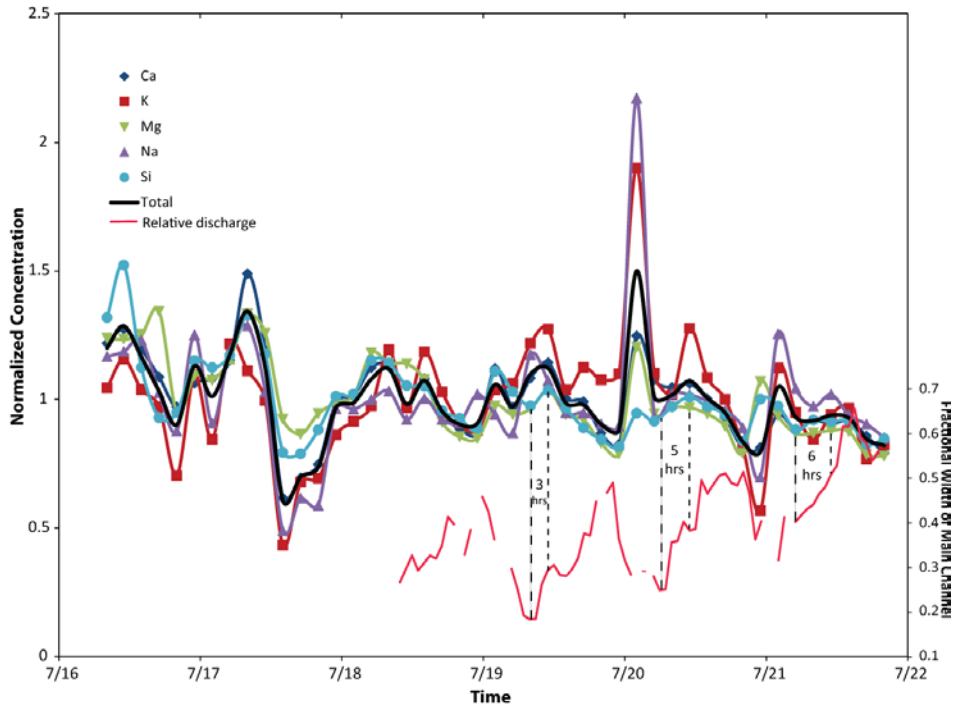

594  
 595 **Figure 5.** Concentration of dissolved cations and Si normalized to average concentration. Discharge from  
 596 relative active channel width is shown for comparison. Lags between active channel width channel minima  
 597 and solute concentration maxima are illustrated with dashed lines.  
 598

599 **Tables:**

600

601 Table 1. Field and laboratory measurements (results in micro-molarity unless otherwise noted)

| Sample  | Time            | pH   | Electrical Conductivity (µS) | Suspended Sediment (gl <sup>-1</sup> ) | Field Alkalinity (µM) | Ca    | K     | Mg   | Na    | Si    | Fl    | Cl    | NO <sub>3</sub> | SO <sub>4</sub> | Calculated Alkalinity |
|---------|-----------------|------|------------------------------|----------------------------------------|-----------------------|-------|-------|------|-------|-------|-------|-------|-----------------|-----------------|-----------------------|
| GL13-1  | 7/16/2013 8:10  | 8.59 | 9.74                         | 1.84                                   | 150                   | 63.11 | 23.24 | 6.36 | 38.12 | 38.67 | 0.70  | 18.24 | 0.85            | 19.67           | 141.17                |
| GL13-2  | 7/16/2013 11:00 | 8.82 | 10.98                        | 1.92                                   | 175                   | 65.99 | 25.72 | 6.33 | 38.77 | 44.68 | 2.86  | 16.65 | 0.82            | 21.16           | 146.46                |
| GL13-3  | 7/16/2013 14:00 | 8.70 | 11.54                        | NA                                     | 150                   | 61.88 | 23.10 | 6.43 | 40.20 | 32.96 | 0.67  | 20.58 | 1.43            | 21.68           | 133.87                |
| GL13-4  | 7/16/2013 17:00 | 8.70 | 9.44                         | NA                                     | 150                   | 56.32 | 21.61 | 6.89 | 33.53 | 27.25 | 0.73  | 14.71 | 0.81            | 18.27           | 128.76                |
| GL13-5  | 7/16/2013 20:00 | 8.65 | 10.04                        | 3.28                                   | 150                   | 50.31 | 15.65 | 4.87 | 28.65 | 27.84 | 0.64  | 7.53  | 0.45            | 15.63           | 114.79                |
| GL13-6  | 7/16/2013 23:00 | 8.75 | 11.22                        | 2.24                                   | 150                   | 55.07 | 24.32 | 5.60 | 40.89 | 33.75 | 0.68  | 23.38 | 1.69            | 15.88           | 129.06                |
| GL13-7  | 7/17/2013 2:00  | 8.73 | 8.82                         | 2.80                                   | 150                   | 55.96 | 18.77 | 5.52 | 29.67 | 32.96 | 0.58  | 11.53 | <0.45           | 17.62           | 124.03                |
| GL13-8  | 7/17/2013 5:00  | 8.84 | 10.32                        | 1.60                                   | 175                   | 59.65 | 27.05 | 5.94 | 38.90 | 34.34 | <0.43 | 22.57 | <0.45           | 19.35           | 135.86                |
| GL13-9  | 7/17/2013 8:00  | 8.90 | 13                           | 2.64                                   | 200                   | 77.11 | 24.73 | 6.83 | 42.06 | 38.95 | 0.70  | 22.27 | 3.91            | 23.84           | 160.13                |
| GL13-10 | 7/17/2013 11:00 | 8.51 | 12.66                        | 2.40                                   | 150                   | 61.76 | 22.14 | 6.46 | 33.64 | 34.54 | 0.74  | 15.23 | 1.16            | 23.85           | 127.40                |
| GL13-11 | 7/17/2013 14:00 | 8.01 | 7.28                         | 1.04                                   | 100                   | 31.93 | 9.62  | 4.74 | 15.96 | 23.29 | 0.55  | 6.56  | <0.45           | 15.56           | 60.69                 |
| GL13-13 | 7/17/2013 17:00 | 8.32 | 6.46                         | 1.68                                   | 100                   | 35.97 | 15.07 | 4.44 | 20.12 | 23.15 | 0.51  | 11.90 | <0.45           | 14.14           | 75.32                 |
| GL13-14 | 7/17/2013 20:00 | 8.62 | 8.2                          | 1.36                                   | 100                   | 38.71 | 15.41 | 4.85 | 19.19 | 25.86 | 0.43  | 8.85  | <0.45           | 14.99           | 82.45                 |
| GL13-15 | 7/17/2013 23:00 | 8.80 | 9.1                          | 3.52                                   | 150                   | 51.23 | 19.17 | 5.06 | 31.51 | 29.70 | 1.27  | 13.49 | <0.45           | 9.54            | 129.42                |
| GL13-16 | 7/18/2013 2:00  | 8.71 | 8.04                         | 3.20                                   | 150                   | 52.52 | 20.33 | 5.21 | 31.44 | 29.94 | 0.74  | 12.48 | 0.87            | 14.55           | 124.02                |
| GL13-17 | 7/18/2013 5:00  | 8.53 | 10.66                        | 2.88                                   | 150                   | 58.17 | 21.66 | 6.06 | 32.69 | 33.77 | 0.87  | 14.59 | 0.76            | 17.66           | 131.26                |
| GL13-18 | 7/18/2013 8:00  | 8.90 | 12.7                         | 3.52                                   | 150                   | 58.34 | 26.52 | 5.85 | 33.74 | 33.52 | 0.92  | 12.56 | <0.45           | 21.50           | 132.18                |
| GL13-19 | 7/18/2013 11:00 | 8.48 | 9.82                         | 2.56                                   | 150                   | 50.27 | 21.52 | 5.84 | 30.12 | 30.90 | 0.73  | 18.38 | <0.45           | 19.98           | 104.80                |
| GL13-20 | 7/18/2013 14:00 | 8.53 | 10.98                        | 3.60                                   | 175                   | 56.00 | 26.34 | 5.53 | 32.80 | 30.84 | 2.03  | 14.21 | 0.80            | 18.63           | 127.88                |
| GL13-21 | 7/18/2013 17:00 | 8.66 | 9.42                         | 3.60                                   | 150                   | 48.92 | 22.88 | 4.68 | 30.15 | 28.08 | 0.61  | 13.82 | 0.66            | 16.16           | 112.80                |
| GL13-22 | 7/18/2013 20:00 | 8.61 | 7.56                         | 4.00                                   | 125                   | 45.92 | 20.21 | 4.39 | 29.79 | 27.19 | 0.64  | 14.99 | 0.98            | 13.68           | 106.64                |
| GL13-23 | 7/18/2013 23:00 | 8.60 | 7.06                         | 3.20                                   | 100                   | 44.93 | 19.53 | 4.35 | 33.33 | 26.04 | 0.50  | 34.89 | 0.60            | 12.51           | 90.43                 |
| GL13-24 | 7/19/2013 2:00  | 8.68 | 14.54                        | 3.84                                   | 125                   | 58.06 | 23.07 | 5.00 | 30.77 | 32.56 | 0.71  | 29.45 | 1.08            | 14.63           | 119.46                |
| GL13-25 | 7/19/2013 5:00  | 8.27 | 9.42                         | 2.56                                   | 150                   | 50.26 | 23.64 | 4.83 | 28.40 | 30.22 | <0.43 | 8.51  | <0.45           | 14.96           | 123.76                |
| GL13-26 | 7/19/2013 8:00  | 8.58 | 10.24                        | 2.80                                   | 150                   | 56.08 | 27.09 | 4.95 | 38.39 | 28.60 | 0.79  | 24.85 | 1.27            | 17.39           | 125.83                |
| GL13-27 | 7/19/2013 11:00 | 8.70 | 10.5                         | 2.64                                   | 150                   | 59.22 | 28.32 | 5.32 | 35.07 | 30.39 | 0.80  | 18.63 | 2.05            | 20.54           | 129.90                |
| GL13-28 | 7/19/2013 14:00 | 8.46 | 11.92                        | 2.24                                   | 150                   | 52.04 | 23.07 | 4.82 | 30.99 | 28.33 | 0.74  | 8.69  | 1.07            | 19.07           | 119.13                |
| GL13-29 | 7/19/2013 17:00 | 8.35 | 11.66                        | 3.44                                   | 125                   | 51.33 | 25.01 | 4.73 | 30.98 | 26.10 | 0.69  | 16.41 | 1.50            | 16.31           | 116.88                |
| GL13-30 | 7/19/2013 20:00 | 8.58 | 7.68                         | 3.84                                   | 100                   | 44.99 | 23.94 | 4.26 | 29.57 | 24.76 | 0.66  | 15.06 | 1.17            | 14.15           | 106.81                |
| GL13-31 | 7/19/2013 23:00 | 8.58 | 7.42                         | 2.96                                   | 100                   | 42.73 | 24.46 | 4.05 | 29.26 | 23.92 | 0.64  | 14.57 | 0.77            | 13.32           | 104.67                |
| GL13-32 | 7/20/2013 2:00  | 8.53 | 15.46                        | 3.12                                   | 200                   | 64.60 | 42.27 | 6.17 | 70.99 | 27.76 | 0.60  | 6.56  | 8.54            | 17.23           | 204.64                |
| GL13-33 | 7/20/2013 5:00  | 8.03 | 8.62                         | 3.68                                   | 150                   | 55.74 | 24.52 | 4.85 | 30.50 | 26.84 | 0.75  | 10.08 | 1.78            | 16.88           | 129.83                |
| GL13-34 | 7/20/2013 8:00  | 8.37 | 9.66                         | 3.20                                   | 150                   | 54.24 | 22.61 | 4.97 | 33.37 | 28.51 | 0.81  | 8.52  | <0.45           | 20.50           | 124.06                |
| GL13-35 | 7/20/2013 11:00 | 8.30 | 11.48                        | 2.16                                   | 150                   | 54.99 | 28.39 | 4.97 | 33.30 | 29.61 | 0.79  | 8.94  | 1.29            | 21.77           | 127.04                |
| GL13-36 | 7/20/2013 14:00 | 8.39 | 9.94                         | 2.88                                   | 150                   | 51.93 | 24.12 | 4.84 | 32.49 | 28.51 | 0.79  | 8.71  | 1.28            | 20.74           | 117.89                |
| GL13-37 | 7/20/2013 17:00 | 8.48 | 10.02                        | 1.84                                   | 150                   | 48.16 | 22.25 | 4.60 | 31.28 | 27.60 | 1.29  | 10.85 | 1.19            | 16.96           | 111.80                |
| GL13-38 | 7/20/2013 20:00 | 8.69 | 9.06                         | 2.00                                   | 125                   | 42.10 | 18.12 | 4.06 | 29.09 | 24.59 | 0.66  | 7.35  | <0.45           | 14.37           | 102.76                |
| GL13-39 | 7/20/2013 23:00 | 8.12 | 6.62                         | 1.44                                   | 100                   | 42.13 | 12.60 | 5.49 | 22.80 | 29.38 | <0.43 | 10.54 | <0.45           | 19.25           | 81.60                 |
| GL13-40 | 7/21/2013 2:00  | 8.80 | 7.68                         | 1.36                                   | 150                   | 48.73 | 24.96 | 4.80 | 40.99 | 28.59 | 0.80  | 12.31 | 1.35            | 15.40           | 127.78                |
| GL13-41 | 7/21/2013 5:00  | 8.20 | 7.22                         | 3.68                                   | 150                   | 45.80 | 21.11 | 4.45 | 34.07 | 25.88 | 0.74  | 12.08 | 1.20            | 15.56           | 110.55                |
| GL13-42 | 7/21/2013 8:00  | 8.70 | 8.24                         | 3.68                                   | 150                   | 47.55 | 18.79 | 4.46 | 31.80 | 26.99 | 0.74  | 8.58  | 1.30            | 17.01           | 109.97                |
| GL13-43 | 7/21/2013 11:00 | 8.42 | 8.76                         | 2.72                                   | 150                   | 46.89 | 20.93 | 4.51 | 33.33 | 26.81 | 0.76  | 8.28  | 0.72            | 17.63           | 112.03                |
| GL13-44 | 7/21/2013 14:00 | 8.12 | 10.24                        | 3.36                                   | 150                   | 47.52 | 21.48 | 4.49 | 30.72 | 26.82 | <0.43 | 9.04  | <0.45           | 16.26           | 114.65                |
| GL13-45 | 7/21/2013 17:00 | 8.32 | 8.08                         | 2.64                                   | 150                   | 44.42 | 17.05 | 4.03 | 29.55 | 24.22 | 1.01  | 10.22 | 1.36            | 14.10           | 102.73                |
| GL13-46 | 7/21/2013 20:00 | 8.62 | 7.44                         | 3.92                                   | 150                   | 40.93 | 18.31 | 4.00 | 27.84 | 24.85 | <0.43 | 7.66  | <0.45           | 13.31           | 101.73                |

602

| Sample  | Time            | pH  | Electrical Conductivity (µS) | Suspended Sediment (g/l) | Field Alkalinity | Calculated Alkalinity | Ca   | K    | Mg  | Na   | Si   | Fl <sup>-</sup> | Cl <sup>-</sup> | NO <sub>3</sub> <sup>2-</sup> | SO <sub>4</sub> <sup>2-</sup> |
|---------|-----------------|-----|------------------------------|--------------------------|------------------|-----------------------|------|------|-----|------|------|-----------------|-----------------|-------------------------------|-------------------------------|
| GL13-1  | 7/16/2013 8:10  | 8.6 | 9.7                          | 1.84                     | 150              | 141.2                 | 63.1 | 23.2 | 6.4 | 38.1 | 38.7 | 0.7             | 18.2            | 0.8                           | 19.7                          |
| GL13-2  | 7/16/2013 11:00 | 8.8 | 11.0                         | 1.92                     | 175              | 146.5                 | 66.0 | 25.7 | 6.3 | 38.8 | 44.7 | 2.9             | 16.6            | 0.8                           | 21.2                          |
| GL13-3  | 7/16/2013 14:00 | 8.7 | 11.5                         | NA                       | 150              | 133.9                 | 61.9 | 23.1 | 6.4 | 40.2 | 33.0 | 0.7             | 20.6            | 1.4                           | 21.7                          |
| GL13-4  | 7/16/2013 17:00 | 8.7 | 9.4                          | NA                       | 150              | 128.8                 | 56.3 | 21.6 | 6.9 | 33.5 | 27.2 | 0.7             | 14.7            | 0.8                           | 18.3                          |
| GL13-5  | 7/16/2013 20:00 | 8.7 | 10.0                         | 3.28                     | 150              | 114.8                 | 50.3 | 15.6 | 4.9 | 28.6 | 27.8 | 0.6             | 7.5             | 0.5                           | 15.6                          |
| GL13-6  | 7/16/2013 23:00 | 8.7 | 11.2                         | 2.24                     | 150              | 129.1                 | 55.1 | 24.3 | 5.6 | 40.9 | 33.8 | 0.7             | 23.4            | 1.7                           | 15.9                          |
| GL13-7  | 7/17/2013 2:00  | 8.7 | 8.8                          | 2.80                     | 150              | 124.0                 | 56.0 | 18.8 | 5.5 | 29.7 | 33.0 | 0.6             | 11.5            | <0.5                          | 17.6                          |
| GL13-8  | 7/17/2013 5:00  | 8.8 | 10.3                         | 1.60                     | 175              | 135.9                 | 59.7 | 27.1 | 6.0 | 38.9 | 34.3 | <0.4            | 22.6            | <0.5                          | 19.6                          |
| GL13-9  | 7/17/2013 8:00  | 8.9 | 13.0                         | 2.64                     | 200              | 160.1                 | 77.1 | 24.7 | 6.8 | 42.1 | 39.0 | 0.7             | 22.3            | 3.9                           | 23.8                          |
| GL13-10 | 7/17/2013 11:00 | 8.5 | 12.7                         | 2.40                     | 150              | 127.4                 | 61.8 | 22.1 | 6.5 | 33.6 | 34.5 | 0.7             | 15.2            | 1.2                           | 23.9                          |
| GL13-11 | 7/17/2013 14:00 | 8.0 | 7.3                          | 1.04                     | 100              | 60.7                  | 31.9 | 9.6  | 4.7 | 16.0 | 23.3 | 0.6             | 6.6             | <0.5                          | 15.6                          |
| GL13-13 | 7/17/2013 17:00 | 8.3 | 6.4                          | 1.68                     | 100              | 75.3                  | 36.0 | 15.1 | 4.4 | 20.1 | 23.2 | 0.5             | 11.9            | <0.5                          | 14.1                          |
| GL13-14 | 7/17/2013 20:00 | 8.6 | 8.2                          | 1.36                     | 100              | 82.5                  | 38.7 | 15.4 | 4.8 | 19.2 | 25.9 | 0.4             | 8.9             | <0.5                          | 15.0                          |
| GL13-15 | 7/17/2013 23:00 | 8.8 | 9.1                          | 3.52                     | 150              | 129.4                 | 51.2 | 19.2 | 5.1 | 31.5 | 29.7 | 1.3             | 13.5            | <0.5                          | 9.5                           |
| GL13-16 | 7/18/2013 2:00  | 8.7 | 8.0                          | 3.20                     | 150              | 124.0                 | 52.5 | 20.3 | 5.2 | 31.4 | 29.9 | 0.7             | 12.5            | 0.9                           | 14.6                          |
| GL13-17 | 7/18/2013 5:00  | 8.5 | 10.7                         | 2.88                     | 150              | 131.3                 | 58.2 | 21.7 | 6.1 | 32.7 | 33.8 | 0.9             | 14.6            | 0.8                           | 17.7                          |
| GL13-18 | 7/18/2013 8:00  | 8.9 | 12.7                         | 3.52                     | 150              | 132.9                 | 58.3 | 26.5 | 5.8 | 33.7 | 33.5 | 0.9             | 12.6            | <0.5                          | 21.5                          |
| GL13-19 | 7/18/2013 11:00 | 8.5 | 9.8                          | 2.56                     | 150              | 104.8                 | 50.3 | 21.5 | 5.8 | 30.1 | 30.9 | 0.7             | 18.4            | <0.5                          | 20.0                          |
| GL13-20 | 7/18/2013 14:00 | 8.5 | 11.0                         | 3.60                     | 175              | 127.9                 | 56.0 | 26.3 | 5.5 | 32.8 | 30.8 | 2.0             | 14.2            | 0.8                           | 18.6                          |
| GL13-21 | 7/18/2013 17:00 | 8.7 | 9.4                          | 3.60                     | 150              | 112.8                 | 48.9 | 22.9 | 4.7 | 30.1 | 28.1 | 0.6             | 13.8            | 0.7                           | 16.2                          |
| GL13-22 | 7/18/2013 20:00 | 8.6 | 7.6                          | 4.00                     | 125              | 106.6                 | 45.9 | 20.2 | 4.4 | 29.8 | 27.2 | 0.6             | 15.0            | 1.0                           | 13.7                          |
| GL13-23 | 7/18/2013 23:00 | 8.6 | 7.1                          | 3.20                     | 100              | 90.4                  | 44.9 | 19.5 | 4.4 | 33.3 | 26.0 | 0.5             | 34.9            | 0.6                           | 12.5                          |
| GL13-24 | 7/19/2013 2:00  | 8.7 | 14.5                         | 3.84                     | 125              | 119.5                 | 58.1 | 23.1 | 5.0 | 30.8 | 32.6 | 0.7             | 29.5            | 1.1                           | 14.6                          |
| GL13-25 | 7/19/2013 5:00  | 8.3 | 9.4                          | 2.56                     | 150              | 123.8                 | 50.3 | 23.6 | 4.8 | 28.4 | 30.2 | <0.4            | 8.5             | <0.5                          | 15.0                          |
| GL13-26 | 7/19/2013 8:00  | 8.6 | 10.2                         | 2.80                     | 150              | 125.8                 | 56.1 | 27.1 | 4.9 | 38.4 | 28.6 | 0.8             | 24.9            | 1.3                           | 17.4                          |
| GL13-27 | 7/19/2013 11:00 | 8.7 | 10.5                         | 2.64                     | 150              | 129.9                 | 59.2 | 28.3 | 5.3 | 35.1 | 30.4 | 0.8             | 18.6            | 2.1                           | 20.5                          |
| GL13-28 | 7/19/2013 14:00 | 8.5 | 11.9                         | 2.24                     | 150              | 119.1                 | 52.0 | 23.1 | 4.8 | 31.0 | 28.3 | 0.7             | 8.7             | 1.1                           | 19.1                          |
| GL13-29 | 7/19/2013 17:00 | 8.4 | 11.7                         | 3.44                     | 125              | 116.9                 | 51.3 | 25.0 | 4.7 | 31.0 | 26.1 | 0.7             | 16.4            | 1.5                           | 16.3                          |
| GL13-30 | 7/19/2013 20:00 | 8.6 | 7.6                          | 3.84                     | 100              | 106.8                 | 45.0 | 23.9 | 4.3 | 29.6 | 24.8 | 0.7             | 15.1            | 1.2                           | 14.2                          |
| GL13-31 | 7/19/2013 23:00 | 8.6 | 7.4                          | 2.96                     | 100              | 104.7                 | 42.7 | 24.5 | 4.1 | 29.3 | 23.9 | 0.6             | 14.6            | 0.8                           | 13.3                          |
| GL13-32 | 7/20/2013 2:00  | 8.5 | 15.5                         | 3.12                     | 200              | 204.6                 | 64.6 | 42.3 | 6.2 | 71.0 | 27.8 | 0.6             | 6.6             | 8.5                           | 17.2                          |
| GL13-33 | 7/20/2013 5:00  | 8.0 | 8.6                          | 3.68                     | 150              | 129.8                 | 55.7 | 24.5 | 4.9 | 30.5 | 26.8 | 0.7             | 10.1            | 1.8                           | 16.9                          |
| GL13-34 | 7/20/2013 8:00  | 8.4 | 9.7                          | 3.20                     | 150              | 124.1                 | 54.2 | 22.6 | 5.0 | 33.4 | 28.5 | 0.8             | 8.5             | <0.5                          | 20.5                          |
| GL13-35 | 7/20/2013 11:00 | 8.3 | 11.5                         | 2.16                     | 150              | 127.0                 | 55.0 | 28.4 | 5.0 | 33.3 | 29.6 | 0.8             | 8.9             | 1.3                           | 21.8                          |
| GL13-36 | 7/20/2013 14:00 | 8.4 | 9.9                          | 2.88                     | 150              | 117.9                 | 51.9 | 24.1 | 4.8 | 32.5 | 28.5 | 0.8             | 8.7             | 1.3                           | 20.7                          |
| GL13-37 | 7/20/2013 17:00 | 8.5 | 10.0                         | 1.84                     | 150              | 111.8                 | 48.2 | 22.3 | 4.6 | 31.3 | 27.6 | 1.3             | 10.8            | 1.2                           | 17.0                          |
| GL13-38 | 7/20/2013 20:00 | 8.7 | 9.1                          | 2.00                     | 125              | 102.8                 | 42.1 | 18.1 | 4.1 | 29.1 | 24.6 | 0.7             | 7.4             | <0.5                          | 14.4                          |
| GL13-39 | 7/20/2013 23:00 | 8.1 | 6.6                          | 1.44                     | 100              | 81.6                  | 42.1 | 12.6 | 5.5 | 22.8 | 29.4 | <0.4            | 10.5            | <0.5                          | 19.6                          |
| GL13-40 | 7/21/2013 2:00  | 8.8 | 7.7                          | 1.36                     | 150              | 127.8                 | 48.7 | 25.0 | 4.8 | 41.0 | 28.6 | 0.8             | 12.3            | 1.4                           | 15.4                          |
| GL13-41 | 7/21/2013 5:00  | 8.2 | 7.2                          | 3.68                     | 150              | 110.6                 | 45.8 | 21.1 | 4.5 | 34.1 | 25.9 | 0.7             | 12.1            | 1.2                           | 15.6                          |
| GL13-42 | 7/21/2013 8:00  | 8.7 | 8.2                          | 3.68                     | 150              | 110.0                 | 47.5 | 18.8 | 4.5 | 31.8 | 27.0 | 0.7             | 8.6             | 1.3                           | 17.0                          |
| GL13-43 | 7/21/2013 11:00 | 8.4 | 8.8                          | 2.72                     | 150              | 112.0                 | 46.9 | 20.9 | 4.5 | 33.3 | 26.8 | 0.8             | 8.3             | 0.7                           | 17.6                          |
| GL13-44 | 7/21/2013 14:00 | 8.1 | 10.2                         | 3.36                     | 150              | 114.6                 | 47.5 | 21.5 | 4.5 | 30.7 | 26.8 | <0.4            | 9.0             | <0.5                          | 16.2                          |
| GL13-45 | 7/21/2013 17:00 | 8.3 | 8.1                          | 2.64                     | 150              | 102.7                 | 44.4 | 17.1 | 4.0 | 29.6 | 24.2 | 1.0             | 10.2            | 1.4                           | 14.1                          |
| GL13-46 | 7/21/2013 20:00 | 8.6 | 7.4                          | 3.92                     | 150              | 101.7                 | 40.9 | 18.3 | 4.0 | 27.8 | 24.9 | <0.4            | 7.7             | <0.5                          | 13.3                          |

603
